# Supplementary material for: Self-Assembly of Homo- and Hetero-Chiral Cyclodipeptides into Supramolecular Polymers towards Antimicrobial Gels
Source: MDPI journal article supplement (doi:10.3390/polym14214554), 2022-10-27
Supplement: s1 [file s1]

**Supporting Information for:**

# **Self-assembly of homo- and hetero-chiral diketopiperazines into supramolecular polymers towards antimicrobial gels**

Beatrice Rosetti <sup>1</sup>, Erica Scarel <sup>1</sup>, Laura Colomina-Alfaro <sup>2</sup>, Simone Adorinni <sup>1</sup>, Giovanni Pierri <sup>3</sup>, Ottavia Bellotto <sup>2</sup>, Kevin Mamprin <sup>1</sup>, Maurizio Polentarutti <sup>4</sup>, Antonella Bandiera <sup>2</sup>, Consiglia Tedesco <sup>3,\*</sup> and Silvia Marchesan <sup>1,\*</sup>

<sup>1</sup> Chemical and Pharmaceutical Sciences Department, University of Trieste, 34127 Trieste, Italy

<sup>2</sup> Life Sciences Department, University of Trieste, 34127 Trieste, Italy

<sup>3</sup> Chemistry & Biology Department, University of Salerno, 84084 Fisciano (SA), Italy

<sup>4</sup> Elettra Sincrotrone, 34127 Trieste, Italy

\* Correspondence: [ctedesco@unisa.it](mailto:ctedesco@unisa.it), [smarchesan@units.it](mailto:smarchesan@units.it)

## **Table of Contents**

|                                                               |    |
|---------------------------------------------------------------|----|
| 1. Cyclo(L-Leu-L-Phe) ( <b>DKP1</b> ) spectroscopic data..... | 2  |
| 2. Cyclo(D-Leu-L-Phe) ( <b>DKP2</b> ) spectroscopic data..... | 4  |
| 3. Cyclo(L-Leu-D-Phe) ( <b>DKP3</b> ) spectroscopic data..... | 6  |
| 4. Cyclo(L-Phe-D-Phe) ( <b>DKP4</b> ) spectroscopic data..... | 8  |
| 5. Single-crystal X-ray diffraction.....                      | 10 |
| 6. Oscillatory rheology.....                                  | 13 |

## 1. Cyclo(L-Leu-L-Phe) (DKP1) spectroscopic data

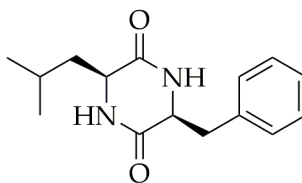

Cyclo(L-Leu-L-Phe)  
DKP1

**$^1\text{H}$  NMR** (400 MHz, DMSO- $d_6$ , TMS),  $\delta$  (ppm): 8.10 (d,  $J$  = 4.0 Hz, 1H, NH), 8.06 (d,  $J$  = 4.0 Hz, 1H, NH), 7.30 – 7.12 (m, 5H, ArH), 4.16 (m, 1H,  $\alpha\text{CH}$  Phe), 3.47 (m, 1H,  $\alpha\text{CH}$  Leu), 3.13 (dd,  $J$  = 13.4, 4.0 Hz, 1H,  $\beta\text{CH}$  Phe), 2.83 (dd,  $J$  = 13.4, 5.0 Hz, 1H,  $\beta\text{CH}$  Phe), 1.41 (m, 1H,  $\gamma\text{CH}$  Leu), 0.76 (m, 1H,  $\beta\text{CH}$  Leu), 0.63 (d,  $J$  = 6.5 Hz, 3H, 1 x  $\text{CH}_3$ ), 0.60 (d,  $J$  = 6.5 Hz, 3H, 1 x  $\text{CH}_3$ ), 0.12 (m, 1H,  $\beta\text{CH}$  Leu).  **$^{13}\text{C}$  NMR** (100 MHz, DMSO- $d_6$ , TMS),  $\delta$  (ppm): 167.4, 166.1 (2 x CO); 136.1, 130.4, 128.1, 126.7 (Ar), 55.4, 52.2 (2 x  $\alpha\text{C}$ ); 43.6, 38.4 (2 x  $\beta\text{C}$ ); 22.9, 22.8, 21.4 (1 x  $\gamma\text{C}$ , 2 x  $\delta\text{C}$ ). MS (ESI):  $m/z$  261.1 ( $\text{M}+\text{H}$ ) $^+$ .

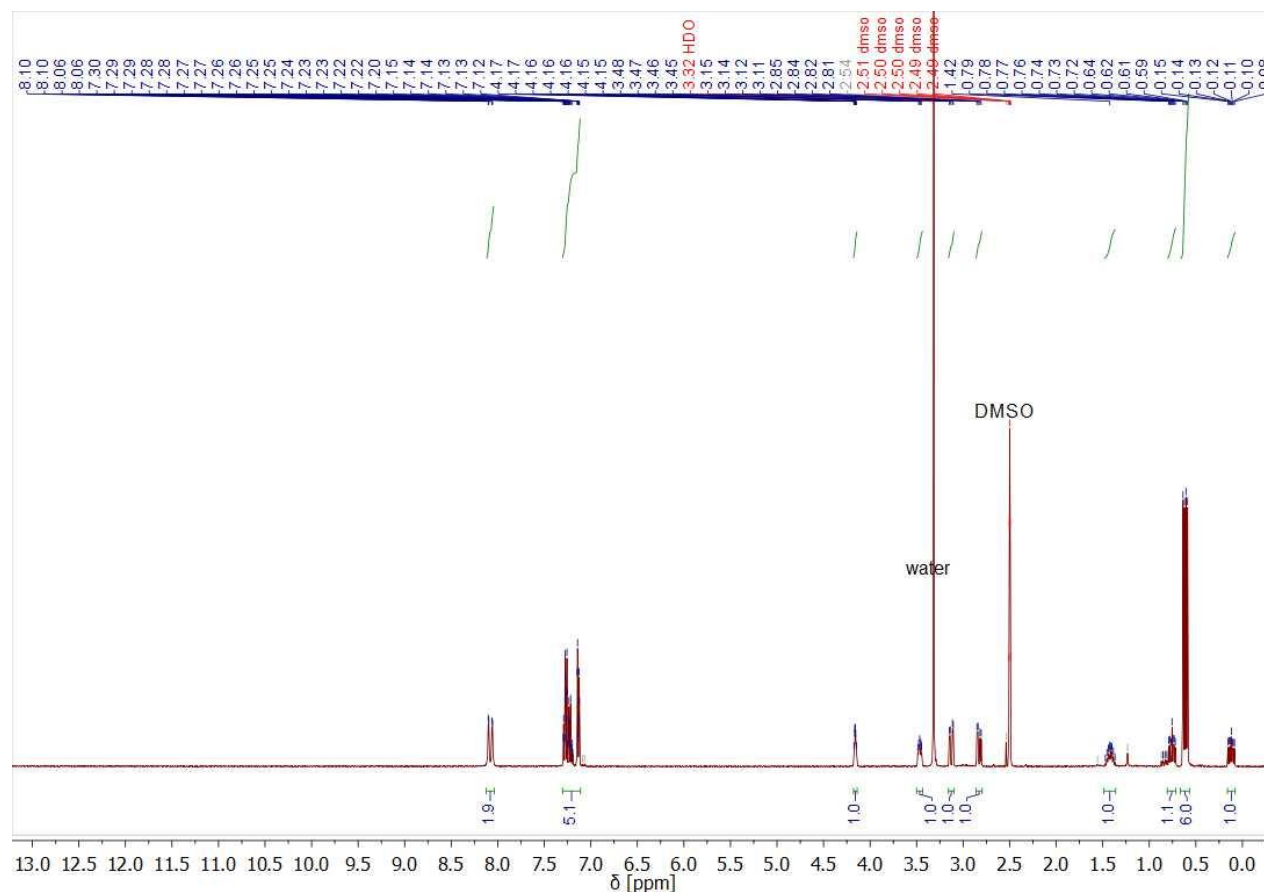

Figure S1.  $^1\text{H}$ -NMR spectrum of DKP1.

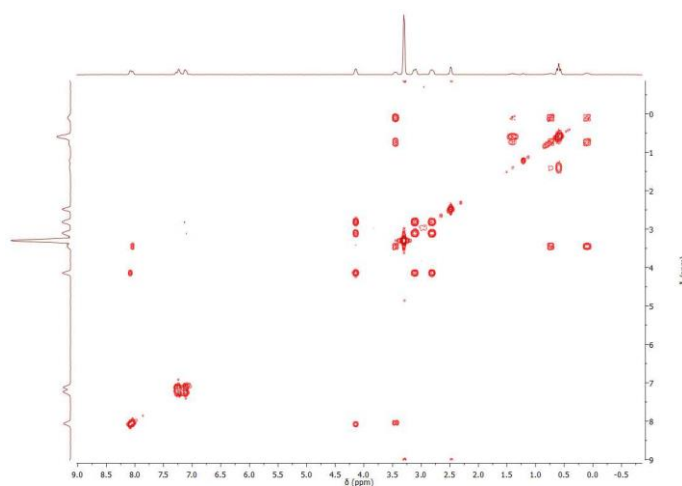

**Figure S2.** gCOSY 2D-NMR spectrum of DKP1.

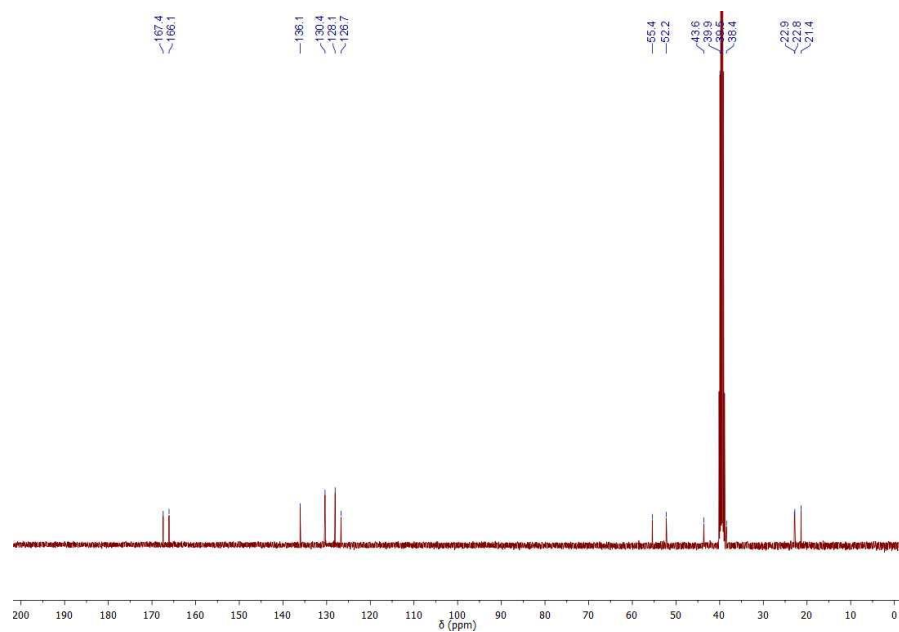

**Figure S3.**  $^{13}\text{C}$ -NMR spectrum of DKP1.

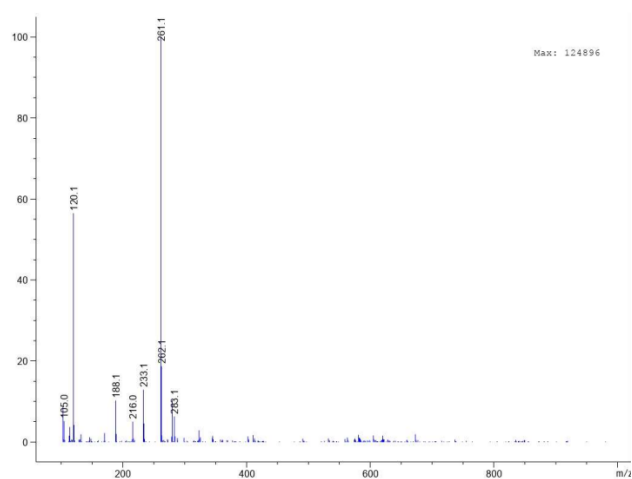

**Figure S4.** ESI-MS spectrum of DKP1 (positive ion mode).

## 2. Cyclo(D-Leu-L-Phe) (DKP2) spectroscopic data

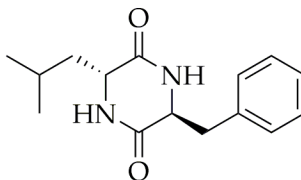

Cyclo(D-Leu-L-Phe)  
DKP2

**$^1\text{H}$  NMR** (400 MHz,  $\text{CD}_3\text{OD}$ , TMS),  $\delta$  (ppm): 8.06 (d,  $J = 4.0$  Hz, 1H, NH), 8.00 (s(br), 1H, NH), 7.29 – 7.18 (m, 5H, ArH), 4.15 (m, 1H,  $\alpha\text{CH}$  Phe), 3.13 (dd,  $J = 13.6, 4.1$  Hz,  $\beta\text{CH}$  Phe), 2.88 (m, 2H,  $\alpha\text{CH}$  Leu,  $\beta\text{CH}$  Phe), 1.71 (m, 1H,  $\gamma\text{CH}$  Leu), 1.45 (m, 1H,  $\beta\text{CH}$  Leu), 1.35 (m, 1H,  $\beta\text{CH}$  Leu), 0.77 (d, 3H,  $J = 6.6$  Hz, 1 x  $\gamma\text{CH}_3$  Leu), 0.73 (d, 3H,  $J = 6.6$  Hz, 1 x  $\gamma\text{CH}_3$  Leu).  **$^{13}\text{C}$  NMR** (100 MHz,  $\text{DMSO}-d_6$ , TMS),  $\delta$  (ppm): 168.3, 167.4(2 x CO); 136.2, 130.1, 128.0, 126.6 (His); 55.2, 51.8 (2 x  $\alpha\text{C}$ ); 41.4, 38.1 (2 x  $\beta\text{C}$ ), 23.4 ( $\gamma\text{C}$ ), 22.7, 21.8 (2 x  $\delta\text{C}$ ). **MS (ESI)**:  $m/z$  261.1 ( $\text{M}+\text{H}$ ) $^+$ .

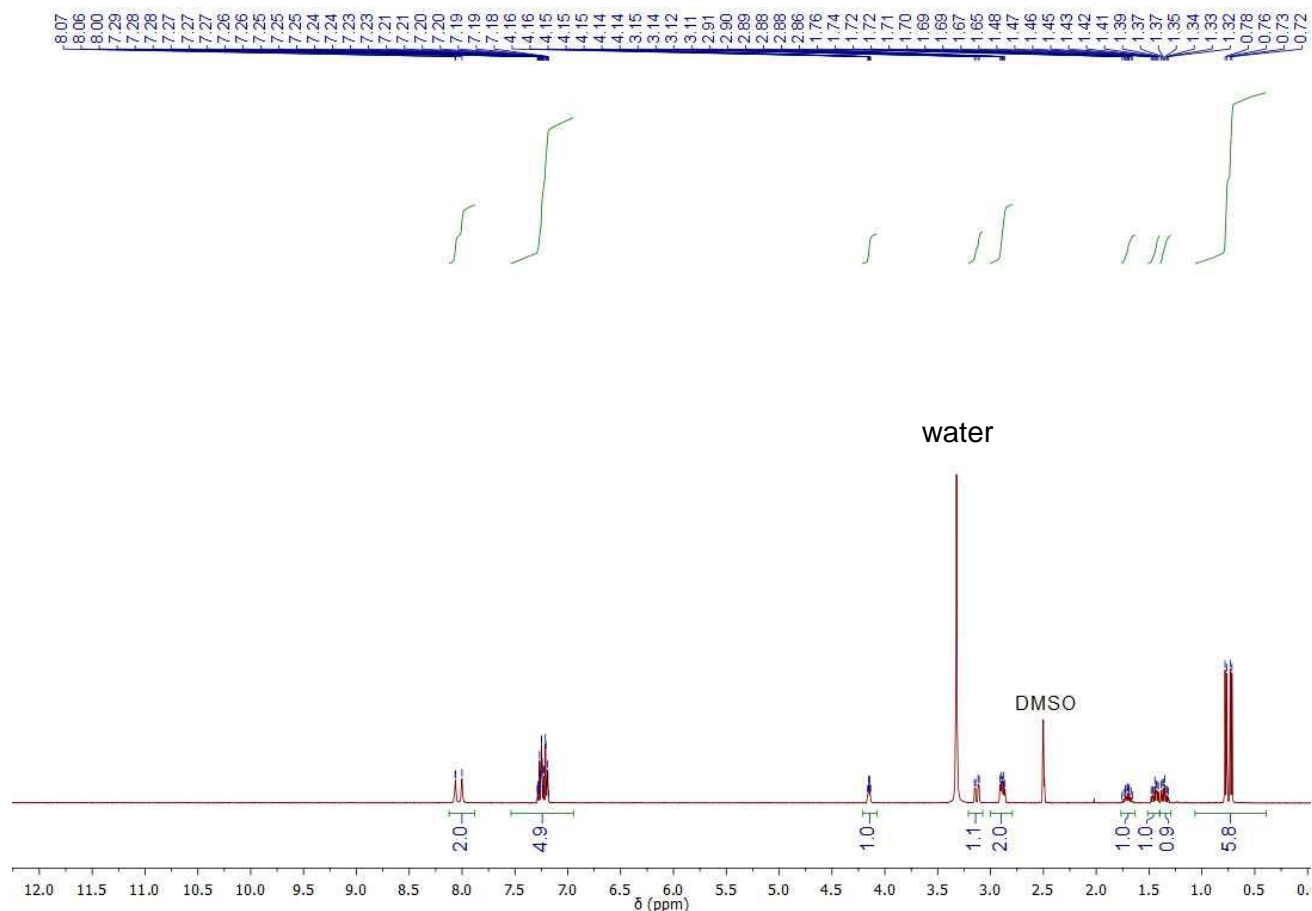

**Figure S5.**  $^1\text{H}$ -NMR spectrum of DKP2.

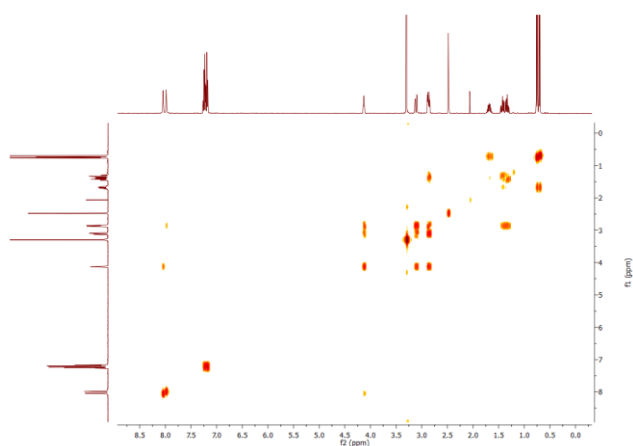

**Figure S6.** gCOSY 2D-NMR spectrum of DKP2.

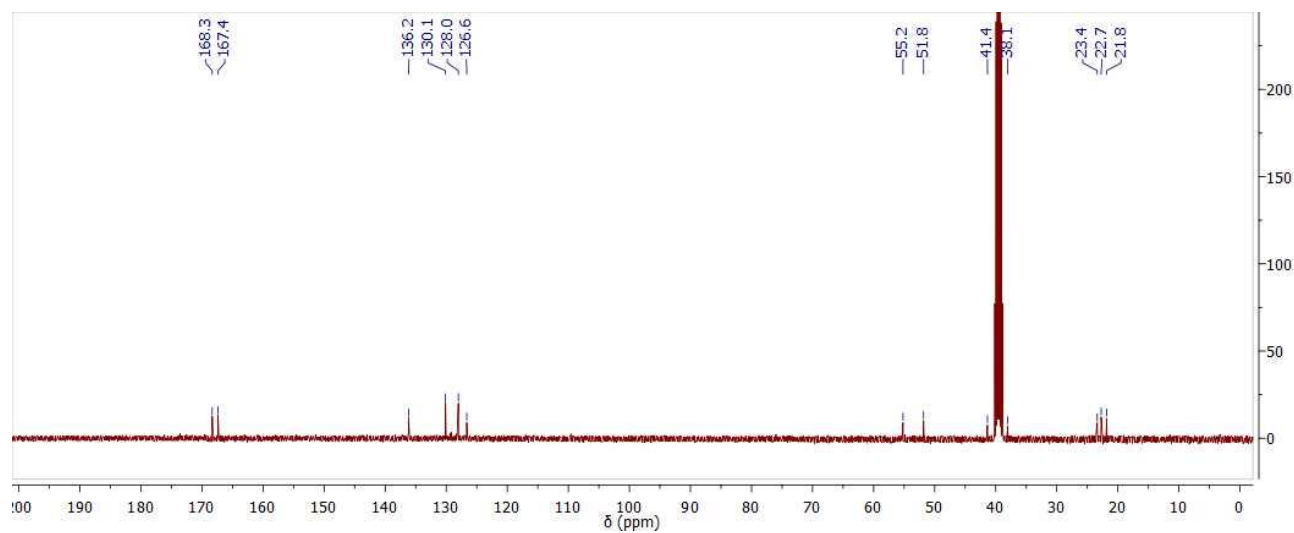

**Figure S7.**  $^{13}\text{C}$ -NMR spectrum of DKP2.

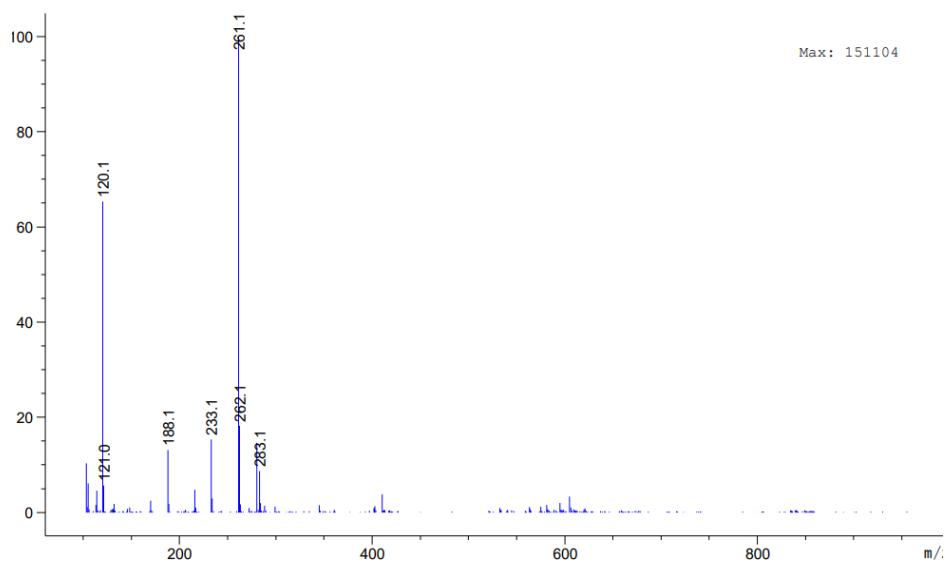

**Figure S8.** ESI-MS spectrum of DKP2 (positive ion mode).

### 3. Cyclo(L-Leu-D-Phe) (DKP3) spectroscopic data

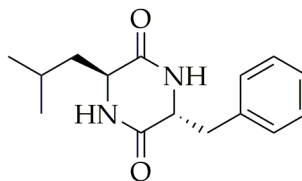

Cyclo(L-Leu-D-Phe)  
DKP3

**$^1\text{H}$  NMR** (400 MHz,  $\text{CD}_3\text{OD}$ , TMS),  $\delta$  (ppm): 8.06 (d,  $J = 4.0$  Hz, 1H, NH), 8.00 (s(br), 1H, NH), 7.29 – 7.18 (m, 5H, ArH), 4.15 (m, 1H,  $\alpha\text{CH}$  Phe), 3.13 (dd,  $J = 13.6, 4.1$  Hz,  $\beta\text{CH}$  Phe), 2.88 (m, 2H,  $\alpha\text{CH}$  Leu,  $\beta\text{CH}$  Phe), 1.71 (m, 1H,  $\gamma\text{CH}$  Leu), 1.45 (m, 1H,  $\beta\text{CH}$  Leu), 1.35 (m, 1H,  $\beta\text{CH}$  Leu), 0.77 (d, 3H,  $J = 6.6$  Hz, 1 x  $\gamma\text{CH}_3$  Leu), 0.73 (d, 3H,  $J = 6.6$  Hz, 1 x  $\gamma\text{CH}_3$  Leu).  **$^{13}\text{C}$  NMR** (100 MHz,  $\text{DMSO}-d_6$ , TMS),  $\delta$  (ppm): 168.3, 167.4 (2 x CO); 136.2, 130.1, 128.0, 126.6 (Ar), 55.2, 51.8 (2 x  $\alpha\text{C}$ ); 41.4, 38.1 (2 x  $\beta\text{C}$ ); 23.4 ( $\gamma\text{C}$ ); 22.7, 21.8 (2 x  $\delta\text{C}$ ). MS (ESI):  $m/z$  261.0 ( $\text{M}+\text{H}$ ) $^+$ .

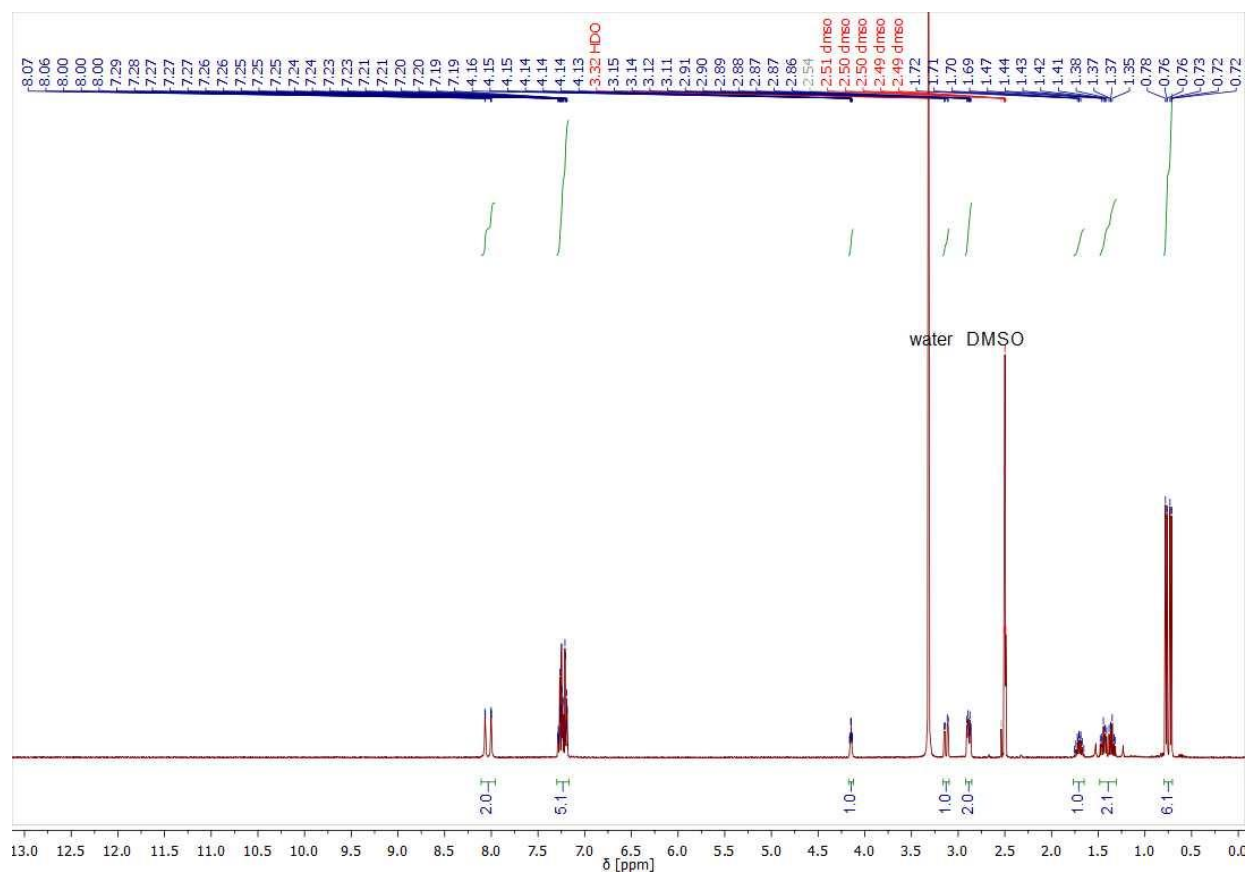

**Figure S9.**  $^1\text{H}$ -NMR spectrum of DKP3.

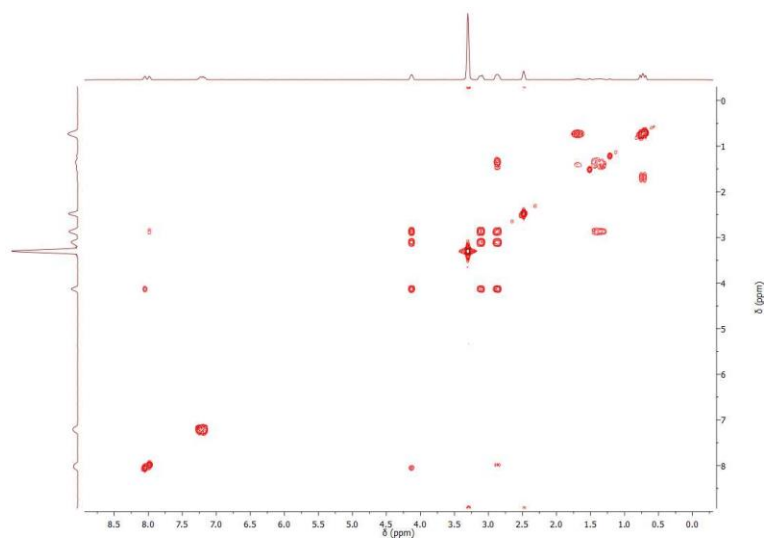

**Figure S10.** gCOSY 2D-NMR spectrum of DKP3.

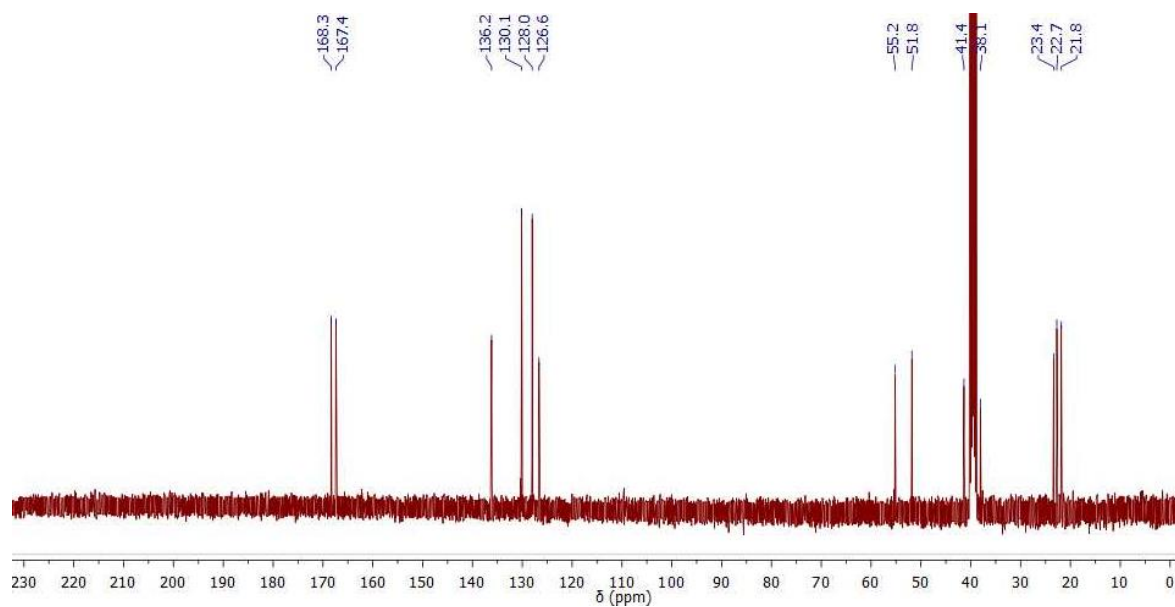

**Figure S11.**  $^{13}\text{C}$ -NMR spectrum of DKP3.

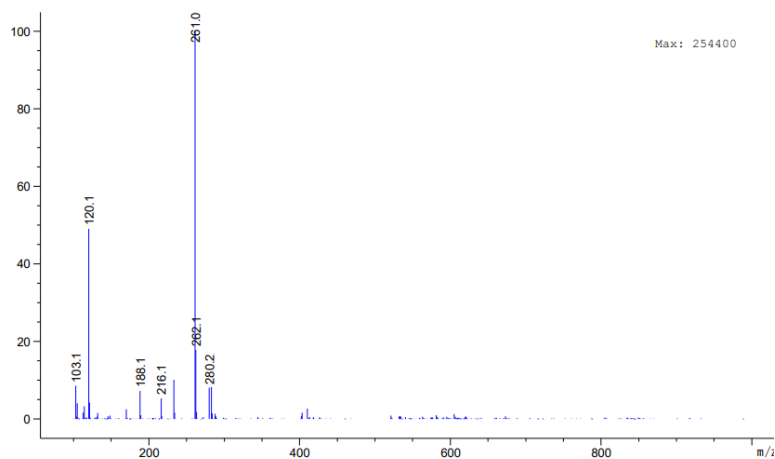

**Figure S12.** ESI-MS spectrum of DKP3 (positive ion mode).

#### 4. Cyclo(D-Phe-L-Phe) (DKP4) spectroscopic data

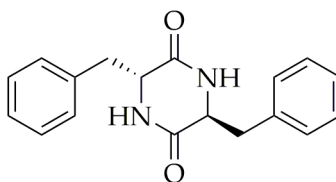

Cyclo(D-Phe-L-Phe)  
DKP4

Figure S13. DKP4.

**<sup>1</sup>H NMR** (400 MHz, DMSO-*d*<sub>6</sub>, TMS),  $\delta$  (ppm): 8.04 (s, 2H, NH), 7.27 – 7.10 (m, 10H, ArH), 3.38 (m, 2H,  $\alpha$ CH), 3.00 (dd,  $J$  = 13.6, 3.6 Hz, 2H,  $\beta$ CH), 2.72 (dd,  $J$  = 13.6, 5.2 Hz, 2H,  $\beta$ CH).  
**<sup>13</sup>C NMR** (100 MHz, CD<sub>3</sub>OD, TMS),  $\delta$  (ppm): 167.3 (2 x CO); 136.4, 130.5, 128.4, 127.1 (Ar); 55.1 (2 x  $\alpha$ C); 38.2 (2 x  $\beta$ C). **MS (ESI)**:  $m/z$  295.0 (M+H)<sup>+</sup>, 317.0 (M + Na)<sup>+</sup>.

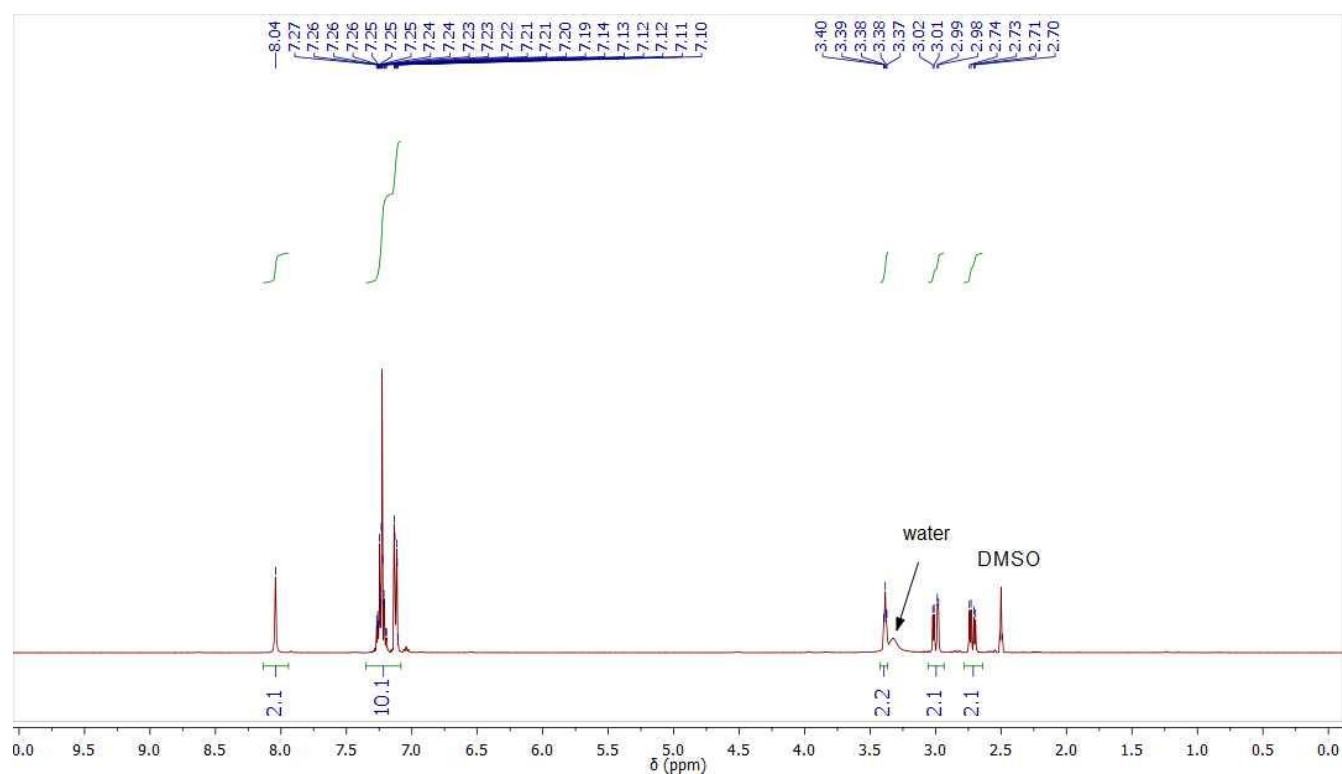

Figure S14. <sup>1</sup>H-NMR spectrum of DKP4.



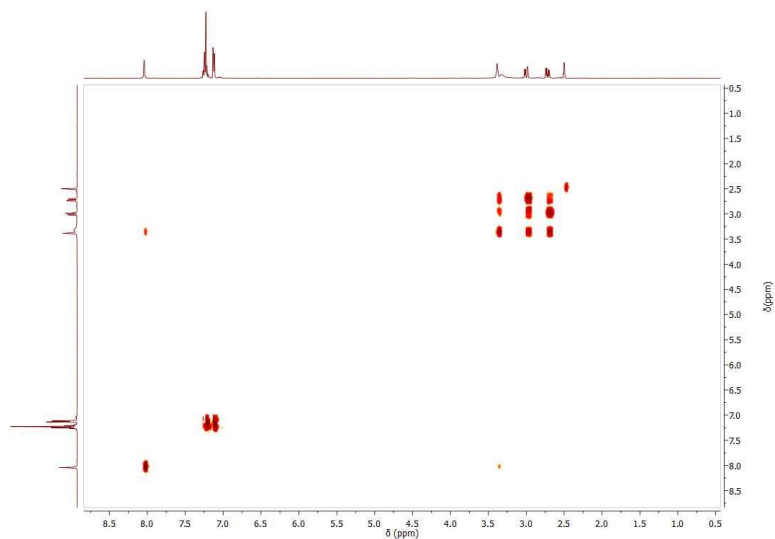

**Figure S15.** gCOSY 2D-NMR spectrum of DKP4.

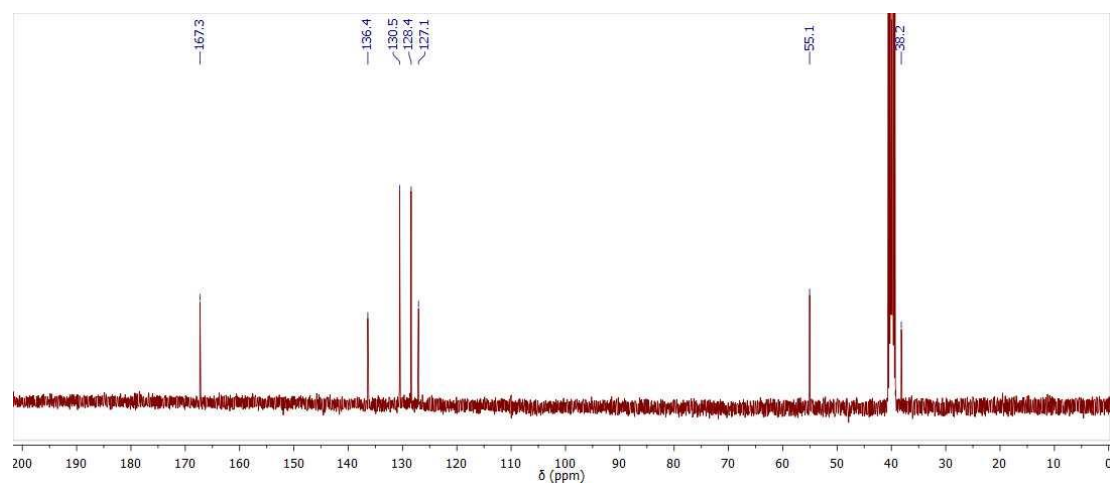

**Figure S16.**  $^{13}\text{C}$ -NMR spectrum of DKP4.

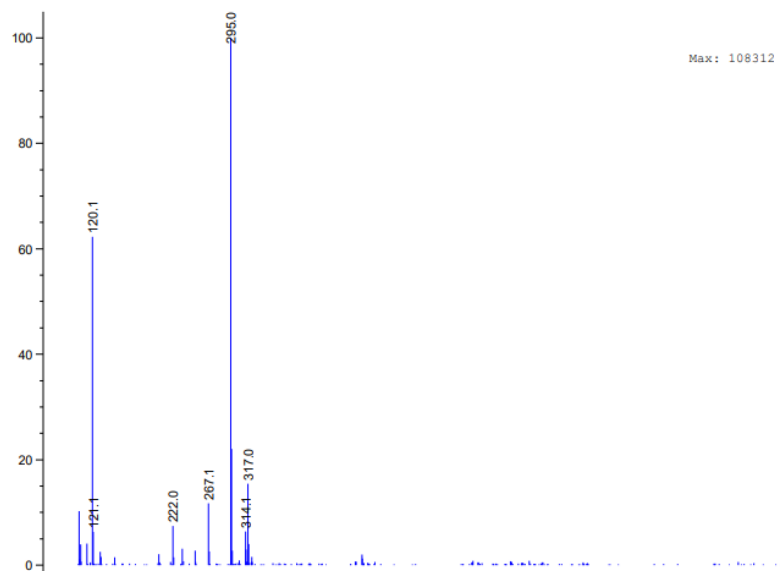

**Figure S17.** ESI-MS spectrum of DKP4 (positive ion mode).

## 5. Single-crystal X-ray diffraction

### **DKP2 (CCDC 2209459) and DKP4 (CCDC 22094598)**

Crystals of DKP2 and DKP4 were mounted on the diffractometer at the synchrotron Elettra, Trieste (Italy), beamline XRD1 and measured at 100 K. Data collection were performed using synchrotron radiation ( $\lambda = 0.7000 \text{ \AA}$ ) with the rotating crystal method ( $0.5^\circ/\text{image}$ ) for a total of 720 images for **DKP2** and 434 for **DKP4**. Data indexing were performed using MOSFLM,<sup>1</sup> while space groups were determined using POINTLESS.<sup>2</sup> The software AIMLESS<sup>3</sup> was used for scaling the data. The structures were solved using the software SHELXT<sup>4</sup> and refined through full matrix least-squares based on  $F^2$  using the programs SHELXL<sup>5</sup> and OLEX2<sup>6</sup> as a GUI.

Non-hydrogen atoms were refined anisotropically, whereas hydrogen atoms were geometrically positioned and included in structure factor calculations but not refined.

ORTEP diagrams (Figs. S18-19) were drawn using OLEX2. In Table S1 are reported relevant the crystallographic data.

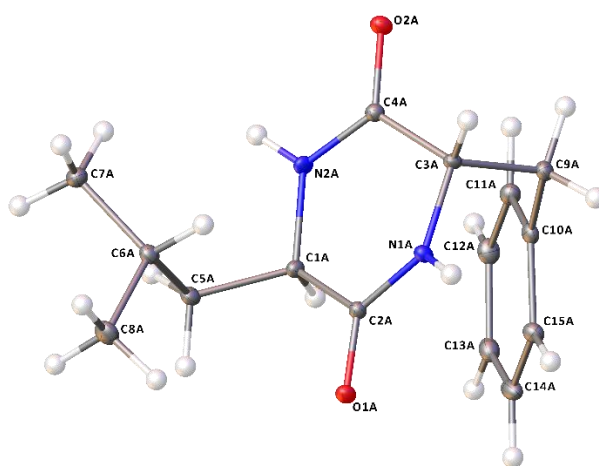

(a)

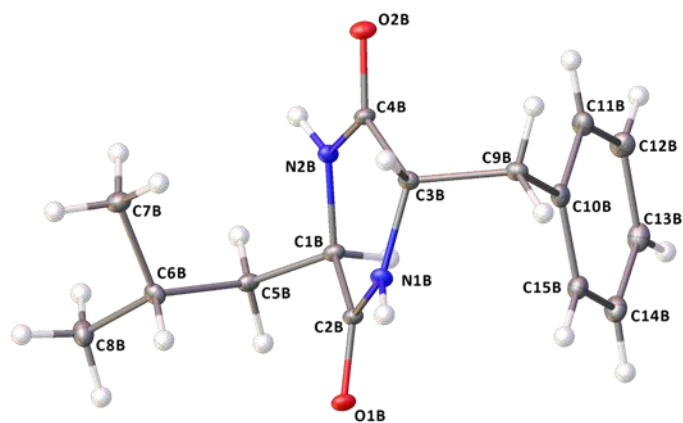

(b)

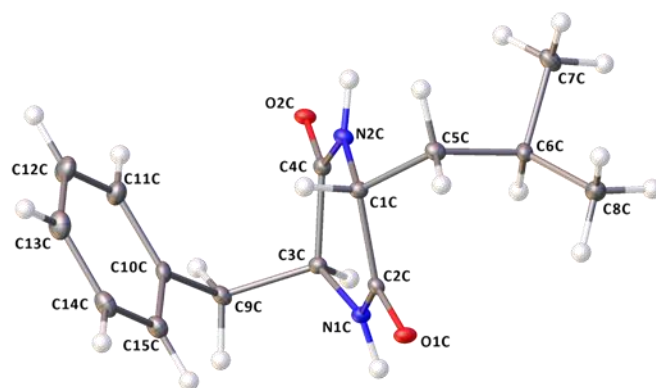

(c)

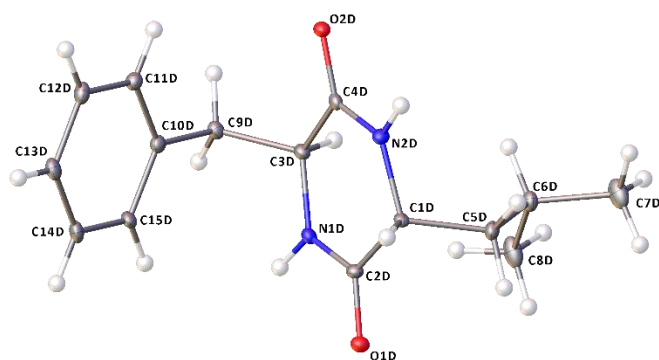

(d)

**Figure S18.** ORTEP diagrams of DKP2. The four independent molecules in the asymmetric unit are reported. Ellipsoid are drawn at 20% probability level. Atom types: C grey, H white, O red, N blue.

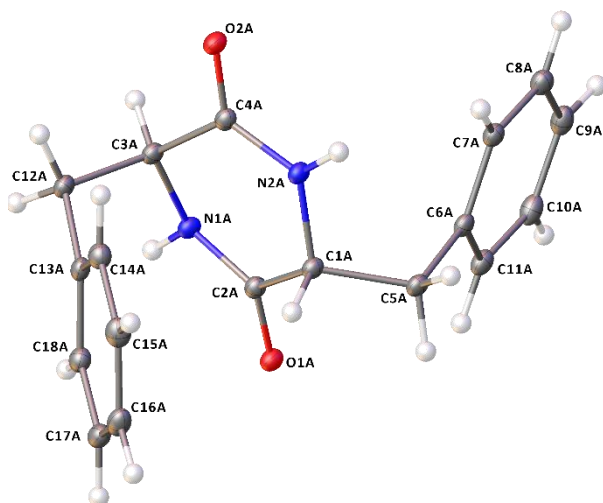

(a)

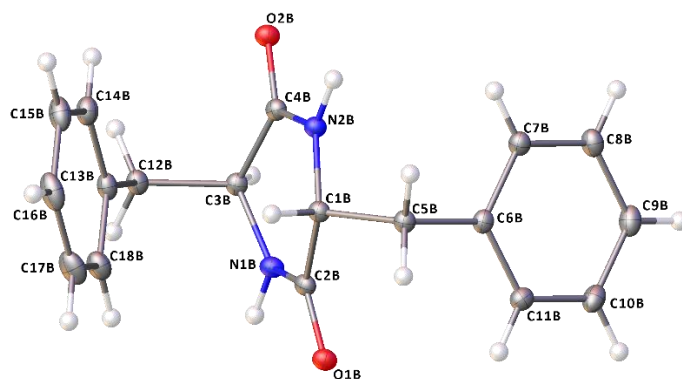

(b)

**Figure S19.** ORTEP diagrams of DKP4. The two independent molecules in the asymmetric unit are reported. Ellipsoid are drawn at 20% probability level. Atom types: C grey, H white, O red, N blue.

**Table S1.** Relevant crystallographic data for the crystal structures DKP2 and DKP4.

|                                | DKP2<br>(CCDC 2209459)                                        | DKP4<br>(CCDC 2209458)                                        |
|--------------------------------|---------------------------------------------------------------|---------------------------------------------------------------|
| <b>T (K)</b>                   | 100                                                           | 100                                                           |
| <b>Formula</b>                 | C <sub>15</sub> H <sub>20</sub> N <sub>2</sub> O <sub>2</sub> | C <sub>18</sub> H <sub>18</sub> N <sub>2</sub> O <sub>2</sub> |
| <b>Formula weight</b>          | 260.33                                                        | 294.34                                                        |
| <b>System</b>                  | triclinic                                                     | monoclinic                                                    |
| <b>Space group</b>             | <i>P</i> 1                                                    | <i>P</i> 2 <sub>1</sub> / <i>c</i>                            |
| <b><i>a</i> (Å)</b>            | 6.0860(12)                                                    | 20.583(4)                                                     |
| <b><i>b</i> (Å)</b>            | 13.994(3)                                                     | 6.0840(12)                                                    |
| <b><i>c</i> (Å)</b>            | 17.283(4)                                                     | 23.864(5)                                                     |
| <b><math>\alpha</math> (°)</b> | 107.61(3)                                                     | 90                                                            |
| <b><math>\beta</math> (°)</b>  | 99.53(3)                                                      | 94.07(3)                                                      |

|                                                    |               |              |
|----------------------------------------------------|---------------|--------------|
| $\gamma (^{\circ})$                                | 91.31(3)      | 90           |
| $V (\text{\AA}^3)$                                 | 1379.4(5)     | 2980.9(10)   |
| $Z$                                                | 4             | 8            |
| $D_x (\text{g cm}^{-3})$                           | 1.254         | 1.312        |
| $\lambda (\text{\AA})$                             | 0.70000       | 0.70000      |
| $\mu (\text{mm}^{-1})$                             | 0.081         | 0.084        |
| $F_{000}$                                          | 560.0         | 1248.0       |
| $R1 (I > 2\sigma I)$                               | 0.0816(12209) | 0.0729(6502) |
| $wR_2$                                             | 0.2526(14325) | 0.2103(8664) |
| <b>N. of param.</b>                                | 694           | 287          |
| <b>GooF</b>                                        | 1.055         | 1.042        |
| $\rho_{min}, \rho_{max} (\text{e}\text{\AA}^{-3})$ | -0.49, 0.52   | -0.43, 0.63  |

## References

- [1] T. G. G. Battye, L. Kontogiannis, O. Johnson, H. R. Powell and A. G. W. Leslie, *Acta Crystallogr., Sect. D*, 2011, **67**, 271–281.
- [2] P. R. Evans, *Acta Crystallogr., Sect. D*, 2006, **62**, 72–82.
- [3] P. R. Evans and G. N. Murshudov, *Acta Crystallogr., Sect. D*, 2013, **69**, 1204–1014.
- [4] Sheldrick, G. M., *Acta Crystallogr., Sect. A*, 2015, **71**, 3–8.
- [5] Sheldrick, G. M., *Acta Crystallogr., Sect. C*, 2015, **71**, 3–8.
- [6] O. V. Dolomanov, L. J. Bourhis, R. J. Gildea, J. A. K. Howard and H. Puschmann, *J. Appl. Cryst.*, 2009, **42**, 339–341.

## 6. Oscillatory rheology

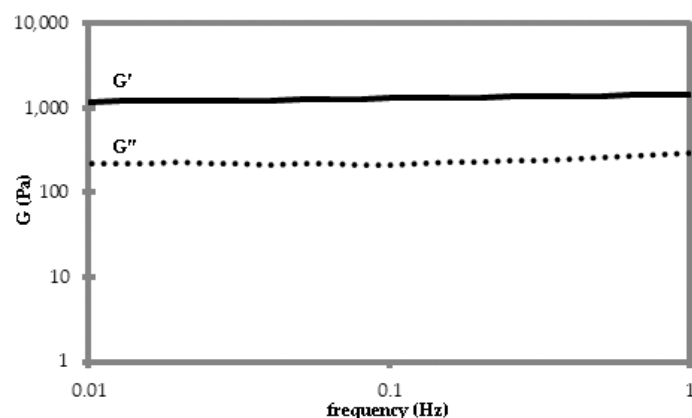

**Figure S20.** Frequency sweep analysis of DKP2 gel in soybean oil.
